# 1 Experiments and simulations on short chain fatty acid production in a colonic 2 bacterial community

3  
4 Bea Yu,<sup>a</sup> Ilija Dukovski,<sup>b,c</sup> David Kong,<sup>d</sup> Johanna Bobrow,<sup>a</sup> Alla Ostrinskaya,<sup>a</sup> Daniel Segre<sup>b,c,e,#</sup>,  
5 Todd Thorsen <sup>a#</sup>  
6

7 <sup>a</sup>MIT Lincoln Lab, 244 Wood Street, Lexington, MA 02421, USA

8 <sup>b</sup>Bioinformatics Graduate Program, Boston University, Boston, MA 02215, USA <sup>c</sup>Biological  
9 Design Center, Boston University, Boston, MA 02215, USA

10 <sup>d</sup>Director, Community Biotechnology Initiative, MIT Media Lab, Massachusetts Institute of  
11 Technology, 77 Mass. Ave., E14/E15, Cambridge, MA 02139 USA

12 <sup>e</sup>Department of Biology, Department of Biomedical Engineering and Department of Physics,  
13 Boston University, Boston, MA 02215, USA

14

15 Running Head: Study of *F. prausnitzii*-*B. thetaiotaomicron* coculture

16 #Address correspondence to: Daniel Segre, [dsegre@bu.edu](mailto:dsegre@bu.edu) and Todd Thorsen,

17 [thorsen@ll.mit.edu](mailto:thorsen@ll.mit.edu)

18 B.Y. and I.D. contributed equally to this work.

DISTRIBUTION STATEMENT A. Approved for public release. Distribution is unlimited.

This material is based upon work supported by the Assistant Secretary of Defense for Research and Engineering under Air Force Contract No. FA8702-15-D-0001. Any opinions, findings, conclusions or recommendations expressed in this material are those of the author(s) and do not necessarily reflect the views of the Assistant Secretary of Defense for Research and Engineering.

19

20

21 **Abstract**

22 Understanding how production of specific metabolites by gut microbes is modulated by  
23 interactions with surrounding species and by environmental nutrient availability is an important  
24 open challenge in microbiome research. As part of this endeavor, this work explores interactions  
25 between *F. prausnitzii*, a major butyrate producer, and *B. thetaiotaomicron*, an acetate producer,  
26 under three different *in vitro* media conditions in monoculture and coculture. *In silico* Genome-  
27 scale dynamic flux balance analysis (dFBA) models of metabolism in the system using  
28 COMETS (Computation of Microbial Ecosystems in Time and Space) are also tested for  
29 explanatory, predictive and inferential power. Experimental findings indicate enhancement of  
30 butyrate production in coculture relative to *F. prausnitzii* monoculture but defy a simple model  
31 of monotonic increases in butyrate production as a function of acetate availability in the medium.  
32 Simulations recapitulate biomass production curves for monocultures and accurately predict the  
33 growth curve of coculture total biomass, using parameters learned from monocultures,  
34 suggesting that the model captures some aspects of how the two bacteria interact. However, a  
35 comparison of data and simulations for environmental acetate and butyrate changes suggest that  
36 the organisms adopt one of many possible metabolic strategies equivalent in terms of growth  
37 efficiency. Furthermore, the model seems not to capture subsequent shifts in metabolic activities  
38 observed experimentally under low-nutrient regimes. Some discrepancies can be explained by  
39 the multiplicity of possible fermentative states for *F. prausnitzii*. In general, these results  
40 provide valuable guidelines for design of future experiments aimed at better determining the  
41 mechanisms leading to enhanced butyrate in this ecosystem.

42

43

#### 44 **Importance**

45 Studies associating butyrate levels with human colonic health have inspired research on  
46 therapeutic microbiota consortia that would optimize butyrate production if implanted in the  
47 human colon. *Faecalibacterium prausnitzii* is commonly observed in human fecal samples and  
48 produces butyrate as a product of fermentation. Previous studies indicate that *Bacteroides*  
49 *thetaiotaomicron*, also commonly found in human fecal samples, may enhance butyrate  
50 production in *F. prausnitzi* when the two species are co-localized. This possibility is  
51 investigated here under different environmental conditions using experimental methods paired  
52 with computer simulations of the whole metabolism of bacterial cells. Initial findings indicate  
53 that interactions between these two species result in enhanced butyrate production. However,  
54 results also paint a nuanced picture, suggesting the existence of a multiplicity of equivalently  
55 efficient metabolic strategies and complex interactions between acetate and butyrate production  
56 in these species that appear highly dependent on specific environmental conditions.

57

#### 58 **Introduction**

59 It is increasingly recognized that metabolites produced by the resident microbiota of the  
60 colon have a major influence on host physiology (1). Dietary substrates dramatically influence  
61 the amount and type of these metabolites produced (2). For instance, fermentation of  
62 carbohydrates produces a number of bioactive compounds, most notably short chain fatty acids  
63 (SCFA) such as butyrate, that have been demonstrated to shape the gut microenvironment, serve  
64 as an energy source for the colonic epithelium, and influence disease through anti-inflammatory,  
65 lipogenic, and anti-apoptotic effects (3–6).

66           The production of metabolites in a microbial community has been suggested to be  
67 heavily modulated by interactions among its members. These interactions manifest in a variety of  
68 modes, ranging from competitive or predatory to commensal and mutualistic exchanges (7).  
69 Additionally, many microbes in nature exist in spatially defined structures (8), such as the  
70 mucosal layer of the gut. Spatial assortment of cells creates locally heterogeneous  
71 subpopulations with varying access to resources that can also modulate inter- and intra-  
72 community behavior (9). A major goal of ongoing efforts in human microbiome research (10) is  
73 to gain enough predictive and quantitative understanding of inter-microbial interactions (11) and  
74 of the metabolic interplay between microbiota and host (12) to be able to understand the effects  
75 of the microbiome on human health. These capabilities could greatly facilitate successful design  
76 of therapeutic strategies for microbiome-related diseases.

77           Efforts towards safely, effectively and reliably engineering microbial communities (9)  
78 to improve human health are, however, limited by insufficient understanding of the nature of the  
79 mechanisms underlying microbial interactions and the way these interactions affect microbiome  
80 dynamics. Anaerobic *in vitro*, *in vivo* and *ex vivo* experiments capable of probing systems similar  
81 to the human colonic environment are difficult and expensive. Previous work uncovering  
82 fundamental properties of SCFA-producing bacteria and their symbiotic partners has used  
83 *Faecalibacterium prausnitzii* as a model system (13–21). This is motivated by the high  
84 prevalence of *F. prausnitzii* as a commensal bacterium in the human large intestine (22) and the  
85 role it plays as one of the major butyrate producers (23). Among the bacteria used for coculture  
86 studies, a common gut commensal, *Bacteroides thetaiotaomicron*, has been chosen in both  
87 experimental (24) and computational (25) analyses of SCFA production. In particular,  
88 experimental efforts to grow *F. prausnitzii* in coculture with *B. thetaiotaomicron* have suggested

89 enhancement of butyrate production in coculture relative to *F. prausnitzii* monoculture (24).  
90 However, the data in this study was obtained only for a single time point and no information on  
91 the dynamics of the biomass or butyrate production was provided. In general, to our knowledge,  
92 no comparison has been previously made between experimentally measured time-courses of the  
93 biomass of these species and their respective metabolic dynamics, when grown individually and  
94 in co-culture.

95 In parallel, computational work based on metabolic network analyses has led to the  
96 construction of genome scale models for each of these bacterial species, and to a computational  
97 assessment of their metabolic capabilities (26–28). The modeling approach used in these studies,  
98 often referred to as constraint-based modeling (or stoichiometric modeling) is based on  
99 simplifying assumptions about the intracellular dynamics of metabolism. It enables quantitative  
100 predictions of the intracellular and exchange fluxes, in addition to the growth rate of different  
101 species. In particular, flux balance analysis (FBA) (29), can be used to calculate the flow of  
102 metabolites through a metabolic network, making it possible to predict the growth rate of an  
103 organism or the rate of production of important metabolites (30) ( see also (31) for a  
104 comprehensive review of different approaches). While the reconstructed networks and the  
105 modeling tools used for making these predictions vary widely in accuracy and predictive power,  
106 the formal representation of metabolism into these mathematical structures and codification of  
107 multi-level processes into algorithms have sparked a revolution in systems biology of  
108 metabolism, enabling precise hypothesis testing, and the formulation of genome-scale based  
109 community modeling. In the context of human gut microbiome studies and inter-species  
110 interactions, modeling work has been shown in particular to provide insight into the stability of  
111 biofilm forming communities (25).

112 In order to make comparisons between computational predictions and experimental  
113 time-course data, it is important to be able to connect detailed knowledge of the intracellular  
114 metabolism of individual organisms to the dynamic metabolic changes occurring in the  
115 surrounding environment. An extension of FBA capable of these types of calculations is  
116 dynamic FBA (or dFBA)(32). Harcombe *et al.* (33) developed a computational framework  
117 specifically designed to help predict the spatio-temporal behavior of synthetic microbial  
118 consortia. This system, known as Computation of Microbial Ecosystems in Time and Space  
119 (COMETS) (33), generates predictions of biomass growth curves as well as detailed time  
120 dynamics of the concentrations of all nutrients and metabolites in the environment. COMETS  
121 has been shown to accurately predict the behavior of small artificial ecosystems.

122 Despite the availability of these experimental data and computational tools, many  
123 fundamental features of the interactions between *F. prausnitzii* and *B. thetaiotaomicron*, as well  
124 as our capacity to predict clinically relevant variables, remain unexplored. While previous  
125 studies have computationally and experimentally analyzed the metabolic capabilities of each of  
126 these bacteria individually (26, 27) and the dependence of these and other bacteria upon different  
127 oxygen levels (25), no direct comparison of experimental and computational time course data for  
128 this consortium under varying conditions has been presented before. In particular, no attempt  
129 has been made to recapitulate or predict these time-courses with dynamic computational models.

130  
131 Here, we provide novel insight into the *F. prausnitzii* - *B. thetaiotaomicron* model  
132 system by combining new experimental measurements of bacterial biomass and environmental  
133 metabolites with COMETS-based computer simulations. We performed a series of anaerobic *in*  
134 *vitro* experiments involving monocultures and cocultures of *F. prausnitzii* and *B.*  
135 *thetaiotaomicron* grown in three different media, and found increased butyrate production in co-

136 culture relative to monoculture under high glucose and acetate concentrations. Upon fitting of six  
137 parameters for metabolic uptake kinetics in monoculture, COMETS simulations were able to  
138 recapitulate biomass time courses in monoculture and predict combined biomass time courses for  
139 coculture. Model predictions for butyrate, however, portray a more complex picture. Accurate  
140 predictions of initial butyrate production rate do not hold at longer times due to the existence of  
141 multiple alternative optima in the flux states and the history-dependence of the dynamical  
142 predictions. Strong sensitivity of the butyrate production curves to specific concentrations of  
143 nutrients, including phosphate, provide insight into the complexity of these metabolic exchanges,  
144 and valuable guidance for future experimental and modeling work.

145

## 146 **Results**

### 147 ***In vitro* and *in silico* coculture biomass dynamics under different nutrient limitations**

148 We initially characterized anaerobic growth of *B. thetaiotaomicron* and *F. prausnitzii*  
149 individually and in coculture, under different levels of carbon availability (low, medium, high,  
150 see Methods). In addition to glucose, acetate was added proportionally, mimicking the  
151 fermentative activity of the rest of the microbiota (13). The presence of acetate in the medium  
152 also allowed us to assess how, even in the absence of *B. thetaiotaomicron*, *F. prausnitzii*  
153 responds to varying acetate availability.

154 Monoculture growth for *B. thetaiotaomicron* appears sensitive to the amount of carbon  
155 provided (Fig. 1). Growth rate and yield increase in medium acetate/glucose medium compared  
156 to low acetate/glucose concentrations. No clear increase in biomass occurred when carbon  
157 abundance was increased from medium to high levels. The amount of *F. prausnitzii* biomass in  
158 monoculture appears insensitive to increase in initial acetate/glucose levels. The combined

159 biomass growth curves of the coculture (measured as a collective OD) closely tracks OD curves  
160 of *B. thetaiotaomicron*, suggesting a prominent role of this bacterium in the consortium. This  
161 observation is consistent with previous experiments (3) in which the combined coculture biomass  
162 OD of *B. adolescentis* and *F. prausnitzii* mirrors the OD of the *B. adolescentis* monoculture,  
163 suggesting that some features of that consortium may be similar to the one studied here, even  
164 across different spatial scales and environmental settings.

165 In parallel to the experimental measurements, we implemented *in silico* simulations of  
166 the same monocultures and cocultures, using previously published genome-scale metabolic  
167 models for the two bacteria (26, 27). In particular, we used COMETS (33) to test whether (i)  
168 parameters from the literature, combined with minimal fitting of unknown parameters, would  
169 recapitulate the observed monoculture behavior and (ii) models tuned for monoculture  
170 experiments would be adequate to predict the outcome of the coculture experiment.

171 Superimposed on the experimental data, Fig. 1 shows the biomass dynamics as  
172 simulated in COMETS. The monoculture simulations were supplemented with empirical  
173 knowledge of uptake  $K_M$  and fitting of  $V_{max}$  values. After selecting initial kinetic parameter  
174 values based on previously determined corresponding parameters for the phosphotransferase  
175 (PTS) transporter (21, 34), a sensitivity analysis allowed us to identify  $V_{max}$  values that provide  
176 best fit of growth curves to monoculture (Fig. 2). This calibration step, similar to that previously  
177 performed in (35), produces simulated OD curves that broadly agree with the experimentally  
178 measured points (see root-mean-squared error (RMSE) in Table 1). Using these parameters for  
179 COMETS simulations of cocultures at the experimentally estimated initial biomass abundances,  
180 coculture predictions track coculture experimental data closely, as shown by predictive RMSE  
181 values (Table 1).



182

### 183 **Coculture conditions impact the average rate of butyrate production in experiments**

184           Throughout all of our experiments, in addition to monitoring the overall OD, we  
185 measured the extracellular abundance of butyrate and acetate. In Fig. 3, the average amount of  
186 butyrate produced by *F. prausnitzii* in coculture appears higher than monoculture in the medium  
187 and high initial acetate/glucose concentrations, but not in the low concentration conditions. In  
188 low acetate/glucose conditions the butyrate production rate in coculture appears suppressed  
189 relative to the one in monoculture. Box's approach in (36), applying ANOVA to summary  
190 statistics describing growth curves, was used to quantify the statistical significance of the  
191 difference in butyrate production curves across different treatments, i.e.: (i) monoculture vs.  
192 coculture conditions (mono/co) and (ii) the three different initial acetate/glucose initial  
193 concentrations (initial glu/ac). Tables 2 and 3 show that the average rate of butyrate production  
194 in *F. prausnitzii* is significantly altered in mono vs. coculture conditions but not across the  
195 different initial abundances of acetate and glucose. The initial acetate/glucose concentrations, but  
196 not mono vs. coculture conditions, significantly change the average rate of acetate production  
197 from *B. thetaiotaomicron*.

198           Interpretation of the above assessments of butyrate and acetate production is limited by  
199 the lack of experimental knowledge of the precise amount of biomass of each species in the  
200 coculture experiments. In particular, in absence of further laborious organism-specific data, it is  
201 impossible to determine whether significant changes in the level of the butyrate curves are due to  
202 *F. prausnitzii* producing more butyrate at the cellular level in the coculture, or whether the  
203 increase is due to an increase in *F. prausnitzii* total biomass, enabled by coculture conditions, or  
204 both. Under these circumstances, COMETS-predicted biomass estimates for each species from

205 coculture simulations (Fig. 6B) enabled hybrid computational-experimental estimates of  
206 biomass-normalized butyrate (Fig. 6A) and acetate (Fig. S2) production curves.

207 Trends of significance in Tables 5 and 6 for the normalized curves are similar to those  
208 for the unnormalized curves, with several exceptions. The average rate of both SCFAs are  
209 significantly affected by mono vs. coculture conditions in the normalized curves. These results  
210 imply that *B. thetaiotaomicron* stimulates butyrate production in *F. prausnitzii* on a per cell basis  
211 rather than by stimulating *F. prausnitzii* biomass production. *B. thetaiotaomicron* biomass-  
212 normalized acetate production curves are not significantly changed in average rate by initial  
213 glucose/acetate levels, in contrast to the non-normalized curves. As a note of caution, it is  
214 important to stress that the normalization relative to untested predicted abundances of individual  
215 species in co-culture should be considered putative. At the same time, it could be viewed as a  
216 valuable strategy for integrating experimental and computational data towards the formulation of  
217 new hypotheses.

218

### 219 **The multiplicity of fermentation states with optimal efficiency influences SCFA time-course** 220 **predictability**

221 Figure 3 shows that COMETS accurately recapitulates the early stages of  
222 accumulation of extracellular butyrate. After 5 hours of growth, however, the picture becomes  
223 more complex. Simulation results at these times suggest that the regulation of butyrate and  
224 lactate pathways may play a major role in the final outcome of the secreted butyrate. To  
225 understand these results, the butyrate fermentation process in *F. prausnitzii* was revisited with  
226 additional computational analyses, specifically focused on alternative fermentation pathways.  
227 Three competing fermentation pathways exist in the curated metabolic network of *F. prausnitzii*.  
228 Pyruvate is fermented to one of the three products (27): (i) lactate, by D-lactate dehydrogenase

229 (reaction ID: LDH<sub>D</sub>), (ii) formate, by pyruvate-formate lyase (reaction ID: PFL) or (iii) butyrate,  
230 by butyryl-CoA:acetate CoA-transferase (reaction ID: BTCOAACCOAT). Butyryl-CoA in turn  
231 is produced from acetyl-CoA (reaction ID: BTCOADH) and acetyl-CoA is converted from  
232 pyruvate by pyruvate:ferredoxin oxidoreductase (reaction ID: POR4i). The balance of metabolic  
233 flow through these three closely coupled fermentation pathways can significantly impact the  
234 production of butyrate in *F. prausnitzii*, depending on environmental conditions.

235 As shown in Figs. 3 and S4, and described in the methods section, COMETS, in its  
236 standard formulation, switches among these competing pathways. In particular, Figure S3 shows  
237 that *F. prausnitzii* switches from predominantly butyrate production activity at time zero to  
238 lactate secretion after 5 hours. This switch coincides with the transition from a single solution  
239 point of the FBA optimization at the early stages of the growth, to conditions where the FBA  
240 optimization algorithm has the freedom of choosing between a multitude of flux solution points,  
241 all corresponding to the same biomass growth rate. This multiplicity of equivalently efficient  
242 steady states (multiple alternative optima, also described in (37)) is best highlighted by  
243 systematically imposing, at each time point, additional features in the dFBA solution process. In  
244 particular, in analogy with flux variability analysis (38), we re-run the COMETS simulations by  
245 adding a secondary objective function at each time point. After maximizing for growth, the  
246 algorithm fixes the growth rate to the identified maximum, and subsequently searches for the  
247 solution that maximizes or minimizes the secretion flux of one of the organic acids, such as  
248 butyrate. Correspondingly, the butyrate secretion flux can be represented in the form of two  
249 curves of butyrate concentration extremes (Fig. 3). Notably, in most of the cases, the  
250 experimentally measured butyrate concentrations occupy a place between these two extremes.  
251 Nutrient limitations seem to be a strong determinant of this multiplicity of alternative optima.

252 The system is particularly sensitive to phosphate concentration, as shown in Figs. 4 and S4, and  
253 is probably due to the strong coupling to phosphate in all butyrate producing pathways. These  
254 simulation results therefore suggest that regulation of the fermentation pathways in *F. prausnitzii*  
255 influence butyrate production under different environmental conditions.

256 The simulated acetate production shown in Fig. 5 tracks experimental time courses for  
257 both *B. thetaiotaomicron* and *F. prausnitzii* monoculture, particularly in the medium and high  
258 initial acetate/glucose conditions. Simulated time courses fall within error bars for average  
259 experimental observations for all time points on the curves. The early stages of the coculture  
260 simulations also closely track experiments. After 5 simulated hours, however, opposite trends in  
261 acetate concentrations appear to mirror the discrepancies with experiment in the butyrate  
262 simulations. While the experiments show depletion, the simulations result in buildup of acetate  
263 in the late stages of the simulations. This inconsistency is also potentially explainable by a  
264 metabolic switch in *F. prausnitzii*, resulting in less acetate consumption to produce butyrate.

265

## 266 **Discussion**

267 We analyzed experimentally and computationally the possible effects of a symbiotic  
268 partner (*B. thetaiotaomicron*) and of environmental conditions (amount of glucose and acetate)  
269 on the biomass of the gut bacterium *F. prausnitzii*, as well as its capacity to produce butyrate. In  
270 monoculture, *F. prausnitzii* seems to continue producing butyrate even after the cells reach  
271 stationary phase (at around 10 hours), suggesting that maintenance processes keep fueling the  
272 butyrate production pathways. Another feature of the monoculture is the relatively low  
273 sensitivity of biomass and butyrate production to glucose and acetate concentrations. In contrast,  
274 biomass and butyrate seem to more strongly depend on the environment in the presence of *B.*

275 *thetaitotaomicron* in the coculture experiments (Figure 3), although this difference is not  
276 statistically significant, based on ANOVA.

277         The possibility of metabolic cross-feeding between *F. prausnitzii* and *B.*  
278 *thetaitotaomicron* has been suggested in previous studies (24). In some of these studies, acetate  
279 production by *B. thetaitotaomicron* is proposed to mediate the interaction between the two  
280 bacteria, facilitating an increased butyrate production by *F. prausnitzii*. While it is likely that  
281 indeed acetate plays a key role in the interaction between the two bacteria, the results of our  
282 study suggest a more complex mode of interaction: First, the statistically significant increase in  
283 butyrate production we observe in coculture does not seem to increase monotonically with the  
284 amount of glucose and acetate, suggesting that either the two carbon sources are saturated (24),  
285 or that acetate exchange is not the only factor dominating butyrate production. Second, as  
286 demonstrated by our COMETS dFBA simulations, the stoichiometry of *F. prausnitzii* suggests  
287 that multiple alternative growth optima are possible (depending on whether or not other nutrients  
288 – most notably phosphate – are limiting in the medium). These different optima can differ  
289 substantially in their combination of fermentation products, thus making the stoichiometry-based  
290 prediction of a specific rate of butyrate production impossible. Instead, only a range of  
291 production rates can be predicted at any given time. This hypothesized degree of freedom in  
292 fermentative pathways could in principle be used by *F. prausnitzii* to modulate its metabolic  
293 activity and its butyrate production rate in response to external signals. Future studies using  
294 dFBA for studying *F. prausnitzii* could use additional constraints (e.g. total flux capacity (38) or

295 regulatory information (38)) to refine the predictions, and to systematically test the effect of  
296 different nutrient limitations and growth media on butyrate production.

297 In this work, COMETS predictions were also used to estimate relative biomass amount  
298 of the two species in coculture, in the absence of experimental observations. Although the  
299 accuracy of the COMETS relative biomass estimates were not confirmed using experimental  
300 data, its ability to predict the total biomass in coculture using parameters learned from  
301 monoculture conditions lends credence to these estimates. Follow-up experiments to fully vet  
302 model accuracy in determining relative biomass in consortia would be invaluable towards  
303 building confidence in hybrid computational-experimental approaches like the one demonstrated  
304 here.

305

## 306 **Methods and Materials**

307 ***COMETS Simulation Configuration*** The metabolic network models we use in this work for  
308 *Bacteroides thetaiotaomicron* strain VPI-5482 and *Faecalibacterium prausnitzii* strain A2-165  
309 were published and made publicly available by Heinken *et al.* in (26) and (27). The COMETS  
310 simulation framework is implemented in Java and described in (33). R and Matlab scripts  
311 transform COMETS outputs to time-course plots. The 3D volume in these simulations contains 5  
312 mL of isotropic medium and biomass. COMETS' ability to model spatial differences in  
313 microbial systems is not explored in these preliminary simulations. Similarly, the dFBA settings,  
314 other than the ones mentioned below, were set at their default values as implemented in  
315 COMETS. The FBA parsimonious optimization was performed using the GUROBI optimizer,  
316 with a primary maximization of the biomass growth rate and a secondary minimization of the  
317 absolute values sum of the metabolic fluxes. The butyrate secretion analysis also included

318 additional maximization and/or minimization of butyrate, lactate and formate uptake. Simulation  
319 run time was 24 hours, with each time step set to 0.01 hour. The death rate was set to zero.

320 The uptake of nutrients was modeled as a saturation Michaelis-Menten curve with two  
321 adjustable parameters, maximum uptake flux,  $V_{\max}$ , and the Michaelis constant  $K_M$ . Our choice  
322 of parameters for the uptake curve was guided by values provided in the original publications of  
323 the models and as reported in the literature (39, 40). The glucose uptake in *F. prausnitzii*, for  
324 example, is governed by PTS transporter (27) with reported  $K_M$  values up to 8.7 mM (34). These  
325 starting values for the uptake parameters were additionally fine-tuned by fitting the single-  
326 species simulations results for the OD to the corresponding experimental curves. **Error!**  
327 **Reference source not found.** shows the fitting procedure for *B. thetaiotaomicron* and *F.*  
328 *prausnitzii* respectively. In the case of *B. thetaiotaomicron* a single value for the maximum  
329 uptake parameter was sufficient to fit the growth curves. The accepted value minimized the  
330 composite reduced chi-squared for all three growth conditions. In the case of *F. prausnitzii*, we  
331 used two values for the maximum uptake. Starting with the value for  $K_M$  we fitted the glucose  
332 and acetate uptake, and then performed a fine tuning for the rest of the metabolites/nutrients.  
333 Parameter values are shown in Table 6.

334 Metabolic activity in the *F. prausnitzii* model showed a nutrient concentration  
335 dependent shift, most sensitive to phosphate depletion, from butyrate producing pathway, to a  
336 lactate producing one, shown in Fig. S3. This shift is characterized by a single solution point of  
337 the FBA optimization sequence, both for minimized and maximized butyrate secretion, at high  
338 values of phosphate concentration, shown in Fig. S4, corresponding to the initial time in the  
339 dFBA simulation. As the substrate is depleted of the nutrients, the system obtains multiple  
340 optimal solution points, with the difference in the butyrate production depending on the

341 secondary optimization of butyrate secretion (Fig. S4) providing a range of possible butyrate  
342 secretion rates at the later stages of the dFBA simulations. The complete set of input as well as  
343 simulations output files can be found in the supplement. COMETS is available to download at  
344 [comets.bu.edu](http://comets.bu.edu).

345  
346 **ANOVA Methodology** Box's method (36) for describing and quantifying differences in growth  
347 curves was implemented as follows. The average rate/level statistic is computed as the average  
348 of the measurements from the first time point concentration measurement subtracted from the  
349 average of the measurements from the last divided by the total time. The rate of butyrate  
350 production for each time bin was computed similarly and the average rate was subtracted from  
351 these for the set of rate deviations that define the shape statistic.

352 We use the Bonferonni corrected significance level of 0.0042 in this study with twelve  
353 comparisons (six per metabolite) to conservatively approximate the 0.05 significance level in  
354 single comparisons. The small number of replicates in our study (3 replicates), results in  
355 relatively low power for ANOVA tests. Insignificant results in our ANOVA analysis may  
356 therefore derive from low power, randomness or some combination of the two (41) for both the  
357 *shape* and *level* ANOVA results. Additionally, violations of homogeneous measurement  
358 covariance matrices and/or normally distributed prediction errors with zero mean could also  
359 result in pessimistically biased significance estimates. In particular, violation of homogeneous  
360 covariance matrices may negatively bias *shape* ANOVA results (42). ANOVA results for *level*  
361 have been shown to be robust to violations of this assumption (43).

362 We did not test our data for violations of these two conditions because tests for normality  
363 and equal variance are themselves inconclusive with small sample sizes. Given that violations of



364 homogeneous measurement covariance matrices can negatively bias significance results in *shape*  
365 ANOVA, the insignificant results in this study should be probed further with larger sample sizes.  
366 Because *level* ANOVA results have been shown to be robust to violations of homogeneous  
367 measurement covariance matrices (43), we are confident in the finding of significant differences  
368 between monoculture and coculture metabolite production curves in *level*/average rate. As is  
369 always the case, however, follow-up studies with larger sample sizes would be advised to both  
370 test reproducibility and lend more power to ANOVA results.

371  
372 ***In Vitro Experimental Configuration/OD600 Analysis*** Bacteria were cultured in Yeast  
373 Casitone (YC) medium, with three different concentrations of supplemented acetic acid/glucose.  
374 “Low” condition: 5.551mM acetic acid, .1% glucose. “Medium” condition: 27.754mM acetic  
375 acid, .5% glucose. “High” condition: 55.507mM acetic acid, 1% glucose. All media were  
376 adjusted to pH 6.8 before autoclaving.

377 Bacterial cultures were started in anaerobic conditions from glycerol stocks stored at -  
378 80°C in 3mL of “Medium” YC medium. After overnight culture, OD600 was measured, and the  
379 cultures were diluted to the nominal OD starting points in 5mL of the three different YC  
380 formulations.

381 The following cultures were started with the initial OD600 values as noted:

382 OD600 ~.02 *B. thetaiotamicron* monoculture

383 OD600 ~.08 *F. prausnitzii* monoculture

384 OD600 ~.02 *B. thetaiotamicron* AND OD600 ~.08 *F. prausnitzii* coculture

385 A baseline 200µL aliquot was taken from each culture, measured by OD600, and stored  
386 at -80 for later MS analysis. Subsequent 200µL aliquots were collected and measured by OD600

387 at 2, 4, 6, 8, 10 and 24 hours and stored for later analysis. The above procedure was repeated in  
388 triplicate, yielding three observations per time point.

389

390 **MSMS Analysis** A flow injection analysis electrospray ionization mass spectrometry (FIA ESI  
391 MSMS) method was used for quantitative detection of short chain fatty acids (SCFA). Acetic,  
392 propionic, butyric and succinic acid were derivatized with 3-nitrophenylhydrazine in the  
393 presence of N-(3-dimethylaminopropyl)-N'-ethylcarbodiimide and pyridine and detected by a  
394 mass spectrometer as a 3-nitrophenylhydrozones in MRM (multiple reaction monitoring) MSMS  
395 mode, as described by J. Han *et al.* (44). To increase precision and robustness of the method, 3-  
396 methylbutyric-2-2-d<sub>2</sub> acid, acetic acid-2-13C and propionic acid -1-13C were used as an  
397 internal standards. Quantitation was done by external standards calibration, where instrument  
398 response for the analyte was measured as a ratio between analyte's and internal standard's peak  
399 areas. The FIA technique did not utilize LC column but rather a direct injection of the sample  
400 into an ESI probe of the mass spectrometer and this decreased time of analysis per sample to two  
401 minutes. The FIA ESI MSMS for the detection of SCFA is sensitive with the limit of detection  
402 for acetic, propionic, butyric and succinic acids at 4, 3, 0.6 and 1.4 μM respectively. The  
403 accuracy of the method was between 98-102%.

404

405 **Reagents** LC MS grade acetonitrile and water were purchased from VWR (Radnor, PA, USA).  
406 N-(3-dimethylaminopropyl)-N'-ethylcarbodiimide HCl, 3-nitrophenylhydrazine HCl, pyridine,  
407 acetic acid, propionic acid, butyric acid, succinic acid, acetic acid 13C, and propionic acid 13C  
408 were purchased from Sigma-Aldrich (St Luis, MO, USA). 3-methylbutyric-2-2-d<sub>2</sub> acid was  
409 purchased from CDN Isotopes (Quebec, CN).

410  
411 **FIA MS/MS system** An Agilent infinity capillary LC pump with micro-autosampler and  
412 thermostat ( Agilent Technologies, Santa Clara, CA, USA) coupled to AB Sciex 4000 Q-TRAP  
413 triple- quadrupole mass spectrometer ( AB Sciex, Concord, Ontario, CN) was used for the  
414 analysis. The flow solvent - five percent water and ninety five percent acetonitrile was delivered  
415 to a mass spectrometer ESI probe at the rate of 350 $\mu$ L/min. Samples for flow injection analysis  
416 were derivatized on the Agilent polypropylene 96 well plate and injected into mass spectrometer  
417 with injection volume of 40 $\mu$ L. Following conditions for the AB Sciex Q-TRAP 4000 were used  
418 for analysis: source temperature 400°C, source gas 40L/min, curtain gas 10L/min, ESI capillary  
419 voltage was set at -4500 volts. Data were acquired in negative polarity multiple reactions  
420 monitoring (MRM) mode for the MRM transitions specified in the Table S1.

421  
422 **Data Availability**  
423 Data files and scripts used to generate the figures presented in this paper can be found in a zipped  
424 directory (Yu\_etal\_Data\_and\_Scripts.zip) downloadable at [https://github.com/segrelab/Fprau-](https://github.com/segrelab/Fprau-Btheta-2018)  
425 Btheta-2018. This directory contains the experimental data and script for statistical analysis and  
426 for generating the figures (DATA\_AND\_FIGURE\_SCRIPTS subdirectory), and COMETS input  
427 and output files (SIMULATIONS\_INPUTS\_AND\_OUTPUTS subditrectory). The *in silico*  
428 experiments were generated using COMETS v.2.5.8, which is freely available at  
429 <http://comets.bu.edu>.

430  
431 **Acknowledgements**

432 DS and ID acknowledge funding from the Defense Advanced Research Projects Agency  
433 (Purchase Request No. HR0011515303, Contract No. HR0011-15-C-0091), the NIH  
434 (5R01DE024468, R01GM121950 and Sub\_P30DK036836\_P&F), and the Boston University  
435 Interdisciplinary Biomedical Research Office. This material is based upon work supported by  
436 the Assistant Secretary of Defense for Research and Engineering under Air Force Contract No.  
437 FA8702-15-D-0001. Any opinions, findings, conclusions or recommendations expressed in this  
438 material are those of the author(s) and do not necessarily reflect the views of the Assistant  
439 Secretary of Defense for Research and Engineering.

440  
441 **References**

- 442 1. Lozupone CA, Stombaugh JI, Gordon JI, Jansson JK, Knight R. 2012. Diversity, stability  
443 and resilience of the human gut microbiota. *Nature* 489:220–230.
- 444 2. Yatsunencko T, Rey FE, Manary MJ, Trehan I, Dominguez-Bello MG, Contreras M,  
445 Magris M, Hidalgo G, Baldassano RN, Anokhin AP, Heath AC, Warner B, Reeder J,  
446 Kuczynski J, Caporaso JG, Lozupone CA, Lauber C, Clemente JC, Knights D, Knight R,  
447 Gordon JI. 2012. Human gut microbiome viewed across age and geography. *Nature*  
448 486:222–227.
- 449 3. Rios-Covian D, Gueimonde M, Duncan SH, Flint HJ, De Los Reyes-Gavilan CG. 2015.  
450 Enhanced butyrate formation by cross-feeding between *Faecalibacterium prausnitzii* and  
451 *Bifidobacterium adolescentis*. *FEMS Microbiol Lett* 362:1–7.
- 452 4. Canani RB, Costanzo M Di, Leone L, Pedata M, Meli R, Calignano A. 2011. Potential  
453 beneficial effects of butyrate in intestinal and extraintestinal diseases. *World J*  
454 *Gastroenterol* 17:1519–1528.
- 455 5. Flint HJ, Duncan SH, Scott KP, Louis P. 2015. Links between diet, gut microbiota

- 456 composition and gut metabolism. *Proc Nutr Soc* 74:13–22.
- 457 6. Lopez-Siles M, Khan TM, Duncan SH, Harmsen HJM, Garcia-Gil LJ, Flint HJ. 2012.  
458 Cultured representatives of two major phylogroups of human colonic *Faecalibacterium*  
459 *prausnitzii* can utilize pectin, uronic acids, and host-derived substrates for growth. *Appl*  
460 *Environ Microbiol* 78:420–428.
- 461 7. Mitri S, Richard Foster K. 2013. The Genotypic View of Social Interactions in Microbial  
462 Communities. *Annu Rev Genet* 47:247–273.
- 463 8. Kolter R, Greenberg EP. 2006. Microbial sciences: The superficial life of microbes.  
464 *Nature* 441:300–302.
- 465 9. Johns NI, Blazejewski T, Gomes ALC, Wang HH. 2016. Principles for designing  
466 synthetic microbial communities. *Curr Opin Microbiol* 31:146–153.
- 467 10. Turnbaugh PJ, Ley RE, Hamady M, Fraser-Liggett CM, Knight R, Gordon JI. 2007. The  
468 Human Microbiome Project. *Nature* 449:804–810.
- 469 11. Venturelli OS, Carr AC, Fisher G, Hsu RH, Lau R, Bowen BP, Hromada S, Northen T,  
470 Arkin AP. 2018. Deciphering microbial interactions in synthetic human gut microbiome  
471 communities. *Mol Syst Biol* 14:e8157.
- 472 12. Nicholson JK, Holmes E, Kinross J, Burcelin R, Gibson G, Jia W, Pettersson S. 2012.  
473 *Metabolic Interactions* 108:1262–1268.
- 474 13. Belzer C, Chia LW, Aalvink S, Chamlagain B, Piironen V, Knol J, de Vos WM. 2017.  
475 Microbial metabolic networks at the mucus layer lead to diet-independent butyrate and  
476 vitamin B12 production by intestinal symbionts. *MBio* 8:1–14.
- 477 14. Das P, Ji B, Kovatcheva-Datchary P, Bäckhed F, Nielsen J. 2018. In vitro co-cultures of  
478 human gut bacterial species as predicted from co-occurrence network analysis. *PLoS One*

- 479 13:1–14.
- 480 15. Duncan SH, Barcenilla A, Stewart CS, Pryde SE, Flint HJ. 2002. Acetate utilization and  
481 butyryl coenzyme A (CoA): Acetate-CoA transferase in butyrate-producing bacteria from  
482 the human large intestine. *Appl Environ Microbiol* 68:5186–5190.
- 483 16. Louis P, Flint HJ. 2009. Diversity, metabolism and microbial ecology of butyrate-  
484 producing bacteria from the human large intestine. *FEMS Microbiol Lett* 294:1–8.
- 485 17. Miquel S, Martin R, Bridonneau C, Robert V, Sokol H, Bermúdez-Humarán LG, Thomas  
486 M, Langella P. 2014. Ecology and metabolism of the beneficial intestinal commensal  
487 bacterium *Faecalibacterium prausnitzii*. *Gut Microbes* 5.
- 488 18. PrévotEAU A, Geirnaert A, Arends JBA, Lannebère S, Van De Wiele T, Rabaey K. 2015.  
489 Hydrodynamic chronoamperometry for probing kinetics of anaerobic microbial  
490 metabolism - Case study of *Faecalibacterium prausnitzii*. *Sci Rep* 5:1–13.
- 491 19. Sokol H, Pigneur B, Watterlot L, Lakhdari O, Bermudez-Humaran LG, Gratadoux J-J,  
492 Blugeon S, Bridonneau C, Furet J-P, Corthier G, Grangette C, Vasquez N, Pochart P,  
493 Trugnan G, Thomas G, Blottiere HM, Dore J, Marteau P, Seksik P, Langella P. 2008.  
494 *Faecalibacterium prausnitzii* is an anti-inflammatory commensal bacterium identified by  
495 gut microbiota analysis of Crohn disease patients. *Proc Natl Acad Sci* 105:16731–16736.
- 496 20. Tremaroli V, Bäckhed F. 2012. Functional interactions between the gut microbiota and  
497 host metabolism. *Nature* 489:242–249.
- 498 21. Stewart CS, Hold GL, Duncan SH, Flint HJ, Harmsen HJM, Hold GL, Harmsen HJM,  
499 Stewart CS, Flint HJ. 2002. Growth requirements and fermentation products of  
500 *Fusobacterium prausnitzii*, and a proposal to reclassify it as *Faecalibacterium prausnitzii*  
501 gen. nov., comb. nov. *Int J Syst Evol Microbiol* 52:2141–2146.

- 502 22. Maier, Eva. 2017. Effect of *Faecalibacterium prausnitzii* on intestinal barrier function and  
503 immune homeostasis.
- 504 23. Vital M, Karch A, Pieper DH. 2017. Colonic Butyrate-Producing Communities in  
505 Humans: an Overview Using Omics Data. *mSystems* 2:e00130-17.
- 506 24. Wrzosek L, Miquel S, Noordine ML, Bouet S, Chevalier-Curt MJ, Robert V, Philippe C,  
507 Bridonneau C, Cherbuy C, Robbe-Masselot C, Langella P, Thomas M. 2013. *Bacteroides*  
508 *thetaiotaomicron* and *Faecalibacterium prausnitzii* influence the production of mucus  
509 glycans and the development of goblet cells in the colonic epithelium of a gnotobiotic  
510 model rodent. *BMC Biol* 11.
- 511 25. Henson M, Phalak P. 2017. Byproduct Cross Feeding and Community Stability in an In  
512 Silico Biofilm Model of the Gut Microbiome. *Processes* 5:13.
- 513 26. Heinken A, Sahoo S, Fleming RMT, Thiele I. 2013. Systems-level characterization of a  
514 host-microbe metabolic symbiosis in the mammalian gut. *Gut Microbes* 4.
- 515 27. Heinken A, Khan MT, Paglia G, Rodionov DA, Harmsen HJM, Thiele I. 2014. Functional  
516 metabolic map of *Faecalibacterium prausnitzii*, a beneficial human gut microbe. *J*  
517 *Bacteriol* 196:3289–3302.
- 518 28. El-Semman IE, Karlsson FH, Shoaie S, Nookaew I, Soliman TH, Nielsen J. 2014.  
519 Genome-scale metabolic reconstructions of *Bifidobacterium adolescentis* L2-32 and  
520 *Faecalibacterium prausnitzii* A2-165 and their interaction. *BMC Syst Biol* 8:1–11.
- 521 29. Orth JD, Thiele I, Palsson BØ. 2010. What is flux balance analysis? *Nat Biotechnol*  
522 28:245–8.
- 523 30. Feist AM, Zielinski DC, Orth JD, Schellenberger J, Markus J, Palsson BØ. 2011. Model-  
524 driven evaluation of the production potential for growth coupled products of *Escherichia*

- 525 coli. *Metab Eng* 12:173–186.
- 526 31. Zomorodi AR, Segrè D. 2016. Synthetic ecology of microbes: mathematical models and  
527 applications Graphical Abstract HHS Public Access. *J Mol Biol J Mol Biol Febr Pt B*  
528 27:837–861.
- 529 32. Mahadevan R, Edwards JS, Doyle FJ. 2002. Dynamic Flux Balance Analysis of diauxic  
530 growth in *Escherichia coli*. *Biophys J* 83:1331–1340.
- 531 33. Harcombe WR, Riehl WJ, Dukovski I, Granger BR, Betts A, Lang AH, Bonilla G, Kar A,  
532 Leiby N, Mehta P, Marx CJ, Segrè D. 2014. Metabolic resource allocation in individual  
533 microbes determines ecosystem interactions and spatial dynamics. *Cell Rep* 7:1104–1115.
- 534 34. Castro R, Neves AR, Fonseca LL, Pool WA, Kok J, Kuipers OP, Santos H. 2009.  
535 Characterization of the individual glucose uptake systems of *Lactococcus lactis*: Mannose-  
536 PTS, cellobiose-PTS and the novel GlcU permease. *Mol Microbiol* 71:795–806.
- 537 35. Louca S, Doebeli M. 2015. Calibration and analysis of genome-based models for  
538 microbial ecology. *Elife* 4:1–17.
- 539 36. Box GEP. 1950. Problems in the Analysis of Growth and Wear Curves Author ( s ): G . E  
540 . P . Box Published by : International Biometric Society Stable URL :  
541 <http://www.jstor.org/stable/3001781> REFERENCES Linked references are available on  
542 JSTOR for this article : You may. *Biometrics* 6:362–389.
- 543 37. Segre D, Vitkup D, Church GM. 2002. Analysis of optimality in natural and perturbed  
544 metabolic networks. *Proc Natl Acad Sci* 99:15112–15117.
- 545 38. Mahadevan R, Schilling CH. 2003. The effects of alternate optimal solutions in constraint-  
546 based genome-scale metabolic models. *Metab Eng* 5:264–276.
- 547 39. Meadows AL, Karnik R, Lam H, Forestell S, Snedecor B. 2010. Application of dynamic



- 548 flux balance analysis to an industrial Escherichia coli fermentation. Metab Eng 12:150–  
549 160.
- 550 40. Jahreis K, Pimentel-Schmitt EF, Brückner R, Titgemeyer F. 2008. Ins and outs of glucose  
551 transport systems in eubacteria. FEMS Microbiol Rev 32:891–907.
- 552 41. Hewitt CE, Mitchell N, Torgerson DJ, Hewitt C, Torgerson D. 2008. significant  
553 Unexpected non-significant results from randomised trials can be difficult to accept . 23–  
554 25.
- 555 42. Snee RD. 1972. American Society for Quality On the Analysis of Response Curve Data  
556 On the Analysis of Response Curve Data. Source: Technometrics 14:47–62.
- 557 43. Grenhouse, Samuel W. Geisser S. 1959. ON METHODS IN THE ANALYSIS OF  
558 PROFILE variance . Furthermore , an analysis of variance approach permits the analysis  
559 of a set of data which cannot be handled by multivariate procedures , namely , the case  
560 where  $n$  , the number of random vectors , is less t. Psychometrika 24:95–112.
- 561 44. Han J, Lin K, Sequeira C, Borchers CH. 2015. An isotope-labeled chemical derivatization  
562 method for the quantitation of short-chain fatty acids in human feces by liquid  
563 chromatography-tandem mass spectrometry. Anal Chim Acta 854:86–94.

564

565

566 **Tables:**

567

|                            | Low   | Medium | High  |
|----------------------------|-------|--------|-------|
| Coculture                  | 0.110 | 0.071  | 0.049 |
| <i>B. thetaiotaomicron</i> | 0.034 | 0.065  | 0.112 |
| <i>F. prausnitzii</i>      | 0.064 | 0.094  | 0.043 |

568  
 569 **Table 1.** Table of RMSE between the values in Fig. 1 measured experimentally and predicted by  
 570 simulations, for monocultures and coculture in three carbon source conditions as described in the  
 571 text.

572  
 573

| Source                | Acetate |      |          |      |        | Butyrate |      |          |      |        |
|-----------------------|---------|------|----------|------|--------|----------|------|----------|------|--------|
|                       | Sum Sq. | d.f. | Mean Sq. | F    | Prob>F | Sum Sq.  | d.f. | Mean Sq. | F    | Prob>F |
| initial glc/ac        | 21.14   | 2    | 10.571   | 0.47 | 0.6277 | 1.3206   | 2    | 0.66032  | 0.69 | 0.5015 |
| mono/co               | 115.13  | 1    | 115.131  | 5.1  | 0.0261 | 0.11956  | 1    | 0.11945  | 0.13 | 0.7237 |
| initialglc/ac*mono/co | 76.86   | 2    | 38.43    | 1.7  | 0.1877 | 0.275    | 2    | 0.13751  | 0.14 | 0.8655 |
| Error                 | 2304.56 | 102  | 22.594   |      |        | 96.9437  | 102  | 0.95043  |      |        |
| Total                 | 2517.69 | 107  |          |      |        | 98.6588  | 107  |          |      |        |

574  
 575 **Table 2.** Analysis of Variance of Shape of Metabolite Curves.

576  
 577

| Source                | Acetate |      |          |       |        | Butyrate |      |          |       |        |
|-----------------------|---------|------|----------|-------|--------|----------|------|----------|-------|--------|
|                       | Sum Sq. | d.f. | Mean Sq. | F     | Prob>F | Sum Sq.  | d.f. | Mean Sq. | F     | Prob>F |
| initial glc/ac        | 20.8263 | 1    | 20.8263  | 17.66 | 0.0012 | 0.17635  | 1    | 0.17635  | 4.29  | 0.0606 |
| mono/co               | 1.6629  | 2    | 0.8315   | 0.7   | 0.5135 | 2.09982  | 2    | 1.04991  | 25.53 | 0      |
| initialglc/ac*mono/co | 13.2214 | 2    | 6.6107   | 5.61  | 0.0191 | 0.41137  | 2    | 0.20568  | 5     | 0.0263 |
| Error                 | 14.1527 | 12   | 1.1794   |       |        | 0.49346  | 12   | 0.04112  |       |        |
| Total                 | 49.8634 | 17   |          |       |        | 3.181    | 17   |          |       |        |

578  
 579 **Table 3.** Analysis of Variance of Average Rate of Metabolite Curves.

580  
 581

| Source                | Acetate  |      |          |      |        | Butyrate |      |          |      |        |
|-----------------------|----------|------|----------|------|--------|----------|------|----------|------|--------|
|                       | Sum Sq.  | d.f. | Mean Sq. | F    | Prob>F | Sum Sq.  | d.f. | Mean Sq. | F    | Prob>F |
| initial glc/ac        | 1.81E+07 | 2    | 9.06E+06 | 0.08 | 0.9272 | 2745098  | 2    | 1372549  | 0.46 | 0.6328 |
| mono/co               | 4.80E+06 | 1    | 4.80E+06 | 0.04 | 0.8417 | 25019.6  | 1    | 25019.6  | 0.01 | 0.9272 |
| initialglc/ac*mono/co | 9.61E+06 | 2    | 4.81E+06 | 0.04 | 0.9606 | 953798   | 2    | 476899   | 0.16 | 0.8526 |
| Error                 | 1.22E+10 | 102  | 1.20E+08 |      |        | 3E+08    | 102  | 2985539  |      |        |
| Total                 | 1.23E+10 | 107  |          |      |        | 3.1E+08  | 107  |          |      |        |

582  
 583 **Table 4.** Analysis of Variance of Average Rate of Metabolite Curves.

584

|  | Acetate | Butyrate |
|--|---------|----------|
|--|---------|----------|

| Source                | Sum Sq.    | d.f. | Mean Sq.  | F     | Prob>F | Sum Sq. | d.f. | Mean Sq. | F     | Prob>F |
|-----------------------|------------|------|-----------|-------|--------|---------|------|----------|-------|--------|
| initial glc/ac        | 162363.1   | 1    | 162363.1  | 1.57  | 0.234  | 11506.9 | 1    | 11506.9  | 0.2   | 0.6612 |
| mono/co               | 3919429.3  | 2    | 1959714.6 | 18.96 | 0.0002 | 1156514 | 2    | 578257   | 10.15 | 0.0026 |
| initialglc/ac*mono/co | 2590821    | 2    | 1295410.5 | 12.53 | 0.0012 | 517152  | 2    | 258576   | 5.54  | 0.0341 |
| Error                 | 12640529.9 | 12   | 103377.5  |       |        | 683892  | 12   | 56991    |       |        |
| Total                 | 7913143.3  | 17   |           |       |        | 2369065 | 17   |          |       |        |

585  
586 **Table 5.** Analysis of Variance of Average Rate of Biomass-Normalized Metabolite Curves.

587

| Species                    | $V_{max}$ [mmol/hg] | Glc./Ac. $V_{max}$ [mmol/hg] | $K_m$<br>[mM] | Glc./Ac. $K_m$<br>[mM] |
|----------------------------|---------------------|------------------------------|---------------|------------------------|
| <i>B.thetaiotaomicoron</i> | 11                  | 11                           | 3             | 3                      |
| <i>F. prausnitzii</i>      | 23                  | 10                           | 10            | 5                      |

588  
589 **Table 6.** Parameters of the Michaelis-Menten uptake functions. Glucose and acetate uptake  
590 parameters were obtained independently from the rest of the nutrients for the model of *F.*  
591 *prausnitzii*.

592

593 **Supplemental table legend:**

594 Table S1. AB Sciex 4000-TRAP parameters used for detection of SCFA Q1 – m/z of the analyte  
595 ion detected on the 1st quadrupole. Q3 – m/z of the anatyte’s fragment ion detected on the third  
596 quadrupole. DP- declustering potential, CE – collision energy. Analytes in red are internal  
597 standards.

598

599 **Figure legends:**

600 **Figure 1.** Optical densities for single species and coculture of *F. prausnitzii* and *B.*  
601 *thetaiotaomicron*, grown in three different media conditions. The simulations (solid curves) were

602 obtained by dFBA with the same set of uptake parameters for all media conditions. The columns  
603 correspond to the media conditions while the rows correspond to the cultured species.

604

605 **Figure 2.** The sensitivity of the OD curves to the values of the maximum nutrient uptake  
606 parameter  $V_{max}$ . The values of the  $V_{max}$  parameter used in the simulations were obtained by  
607 minimizing  $\chi^2$ , the sum of the squared deviations of the simulation from the experimental values,  
608 weighted by the measured variance. We used a single value of  $V_{max}$  for the uptake of all  
609 nutrients by the *B. thetaiotaomicron* model, with the minimum of minimizing  $\chi^2$ , shown in panel  
610 A). In the case of *F. prausnitzii*, we determined two separate values of minimizing  $\chi^2$ , one for  
611 glucose and acetate uptake shown on panel B), and another one for the rest of the nutrients,  
612 shown on panel C).

613

614 **Figure 3.** Experimental and simulated (solid, dot and dash curves) butyrate production  
615 time courses for monocultures and coculture under the three initial glucose/acetate initial  
616 concentrations. Apparent differences demonstrated in these plots in butyrate production for *F.*  
617 *prausnitzii* monoculture vs. coculture and for the three initial concentrations can be tested  
618 statistically using ANOVA on summary statistics describing the curves. The simulated curves  
619 correspond to the maximized (solid curve) and minimized (dash dot curve) butyrate secretion.

620

621 **Figure 4.** Simulated butyrate production for three starting abundances of phosphate for  
622 the low initial acetate/glucose concentration. Lowering of the phosphate concentration leads to  
623 multiple FBA solutions and difference between secondary minimization and maximization of  
624 butyrate secretion.

625

626 **Figure 5.** Experimental and simulated (solid curves) acetate production time courses for

627 monocultures and coculture under the three initial glucose/acetate initial concentrations.

628 Apparent differences demonstrated in these plots in butyrate production for *F. prausnitzii*

629 monoculture vs. coculture and for the three initial concentrations can be tested statistically using

630 ANOVA on summary statistics describing the curves.

631

632 **Figure 6.** A) Butyrate concentration time profile, normalized by the simulated *F.*

633 *prausnitzii* biomass, for coculture and monoculture. B) Simulated species composition.

634

635 **Supplemental figure legends:**

636 **Figure S1.** Simulated glucose concentration.

637 **Figure S2.** Biomass normalized acetate concentration.

638 **Figure S3.** Simulated fluxes of key reactions in the butyrate fermentation pathway in *F.*

639 *prausnitzii*, for high glucose concentration, at time zero and 5 hours.

640 **Figure S4.** Simulated butyrate secretion fluxes in *F. prausnitzii*, under secondary

641 maximization/minimization of butyrate or lactate production, as a function of phosphate

642 concentration, in low glucose conditions.

643

644

645

646

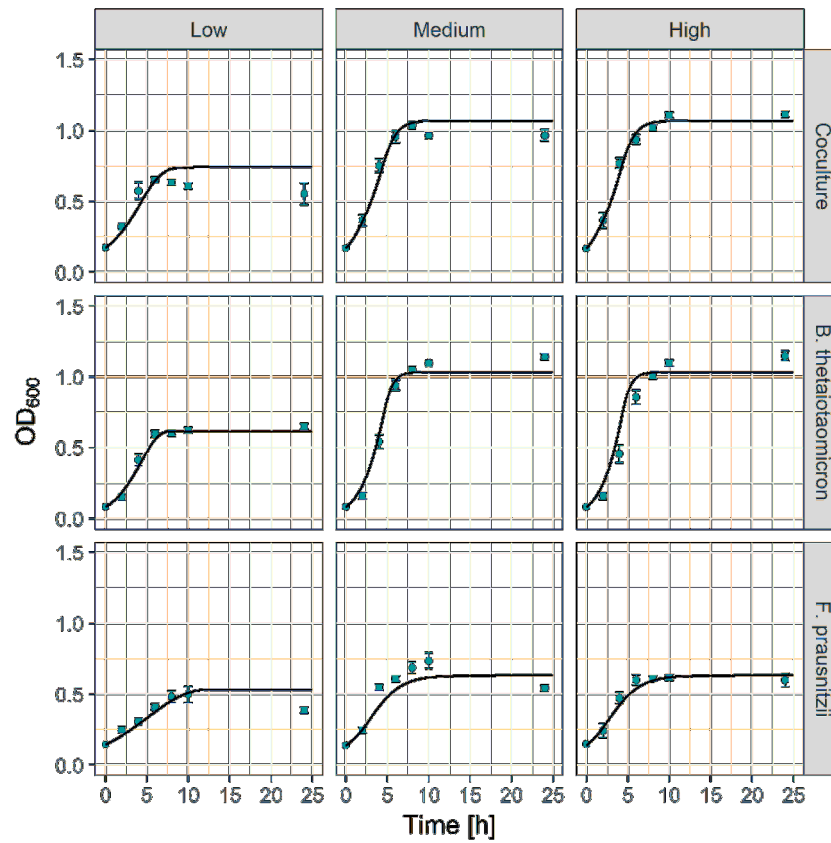

Figure 1. Optical densities for single species and coculture of *F. prausnitzii* and *B. thetaiotaomicron*, grown in three different media conditions. The simulations (solid curves) were obtained by dFBA with the same set of uptake parameters for all media conditions. The columns correspond to the media conditions while the rows correspond to the cultured species.

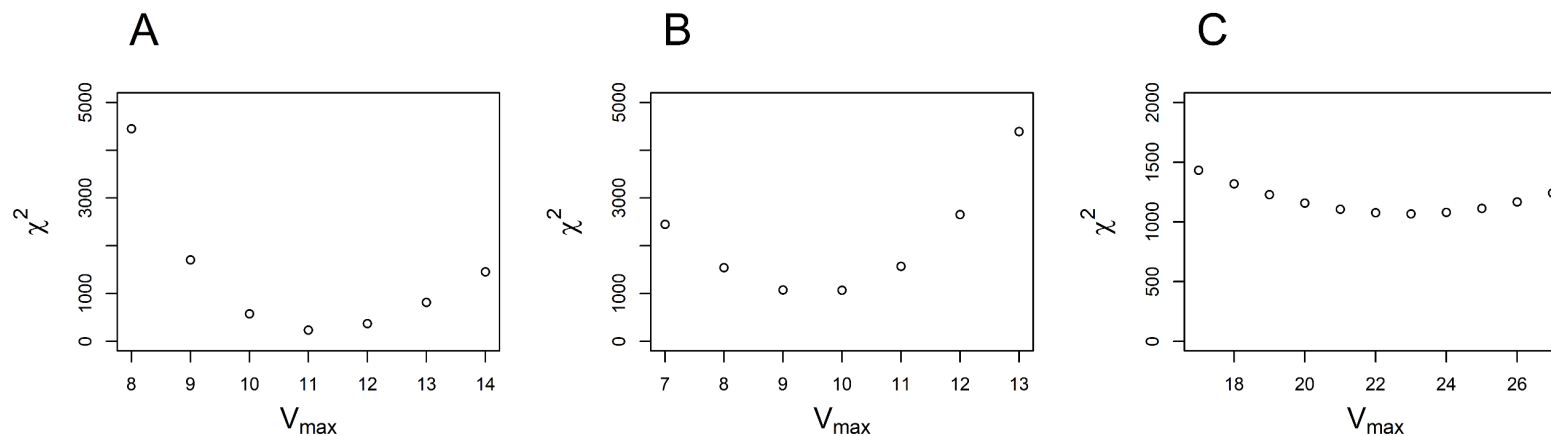

Figure 2. The sensitivity of the OD curves to the values of the maximum nutrient uptake parameter  $V_{max}$ . The values of the  $V_{max}$  parameter used in the simulations were obtained by minimizing  $c^2$ , the sum of the squared deviations of the simulation from the experimental values, weighted by the measured variance. We used a single value of  $V_{max}$  for the uptake of all nutrients by the *B. thetaiotaomicronn* model, with the minimum of minimizing  $c^2$ , shown in panel A). In the case of *F. prausnitzii*, we determined two separate values of minimizing  $c^2$ , one for glucose and acetate uptake shown on panel B), and another one for the rest of the nutrients, shown on panel C).

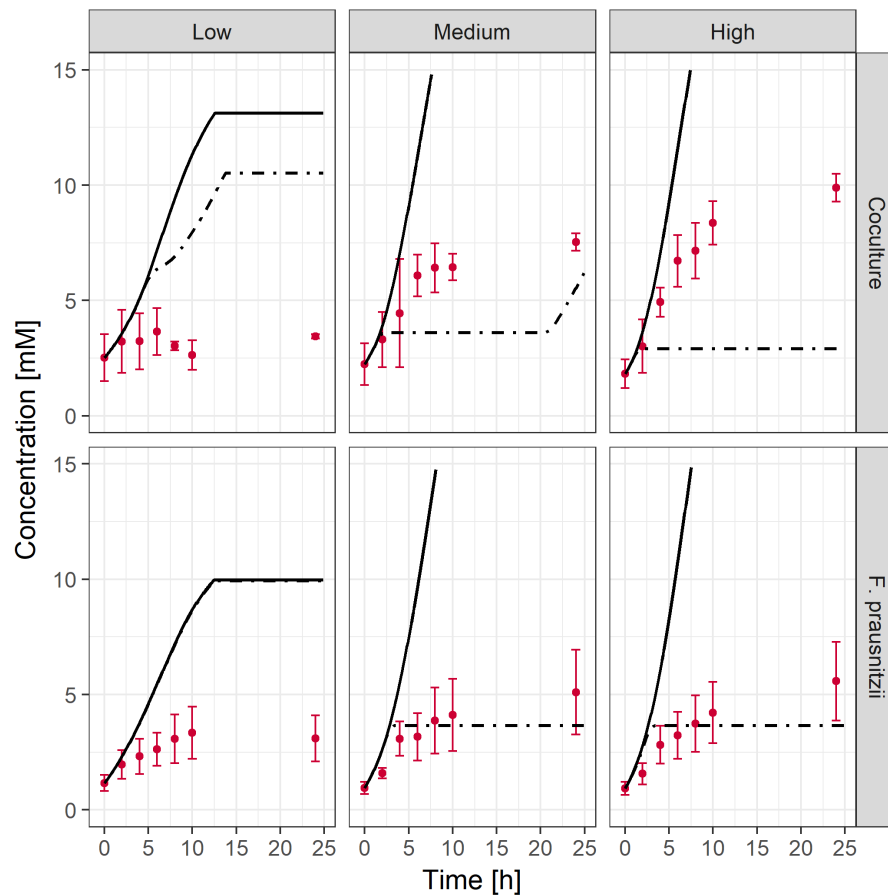

Figure 3. Experimental and simulated (solid, dot and dash curves) butyrate production time courses for monocultures and coculture under the three initial glucose/acetate initial concentrations. Apparent differences demonstrated in these plots in butyrate production for *F. prausnitzii* monoculture vs. coculture and for the three initial concentrations can be tested statistically using ANOVA on summary statistics describing the curves. The simulated curves correspond to the maximized (solid curve) and minimized (dash dot curve) butyrate secretion.



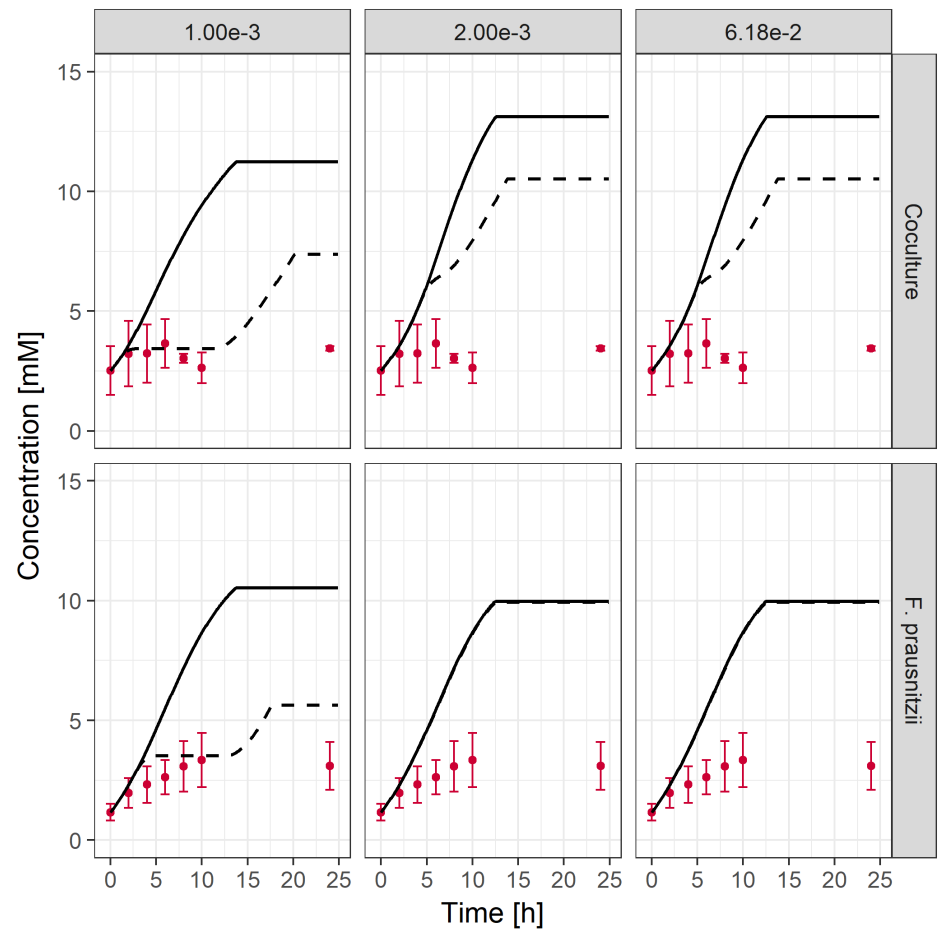

Figure 4. Simulated butyrate production for three starting abundances of phosphate for the low initial acetate/glucose concentration. Lowering of the phosphate concentration leads to multiple FBA solutions and difference between secondary minimization and maximization of butyrate secretion.

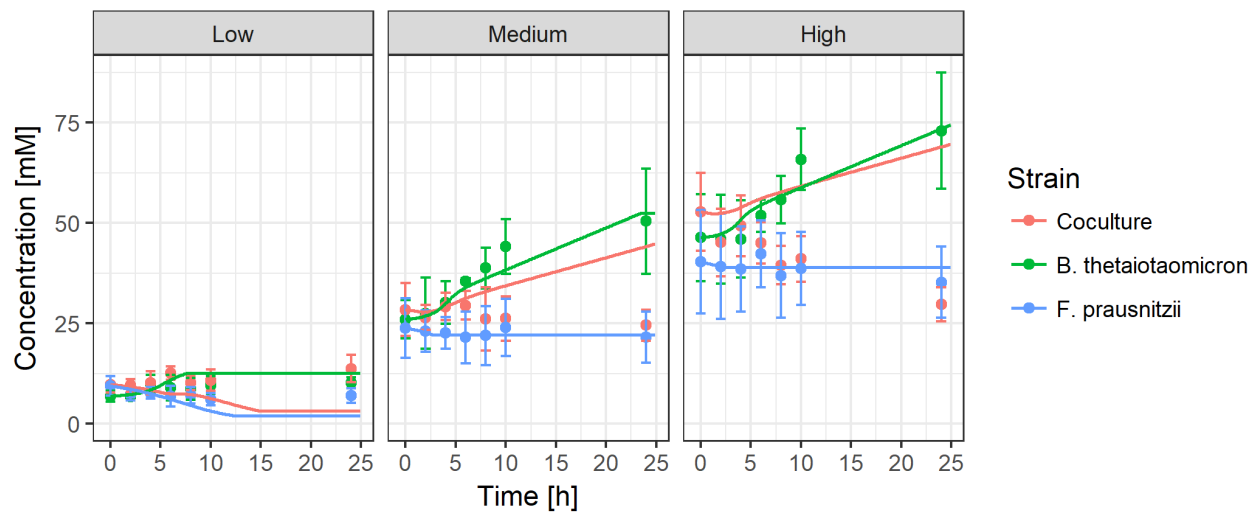

Figure 5. Experimental and simulated (solid curves) acetate production time courses for monocultures and coculture under the three initial glucose/acetate initial concentrations. Apparent differences demonstrated in these plots in butyrate production for *F. prausnitzii* monoculture vs. coculture and for the three initial concentrations can be tested statistically using ANOVA on summary statistics describing the curves.

A

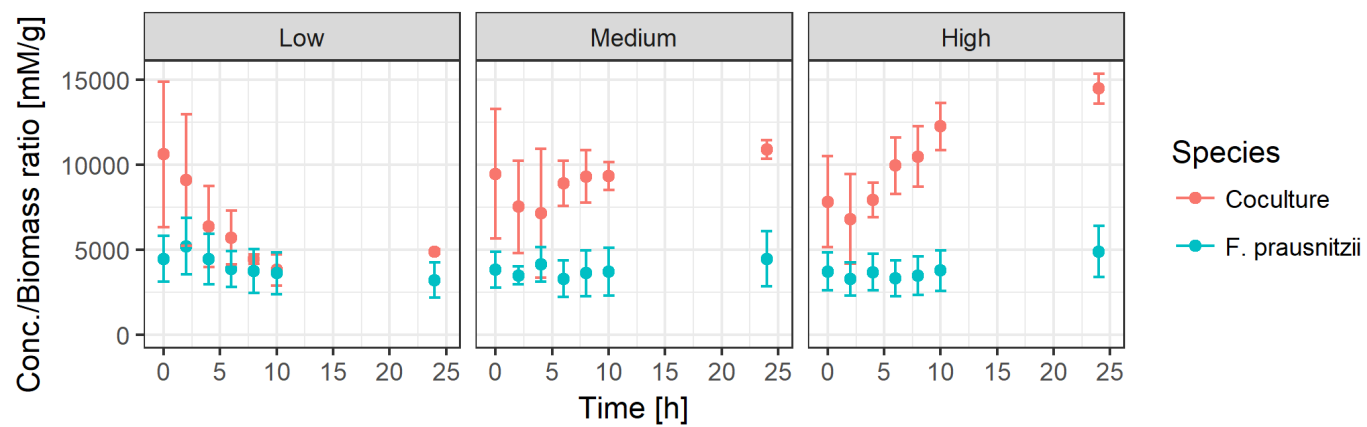

B

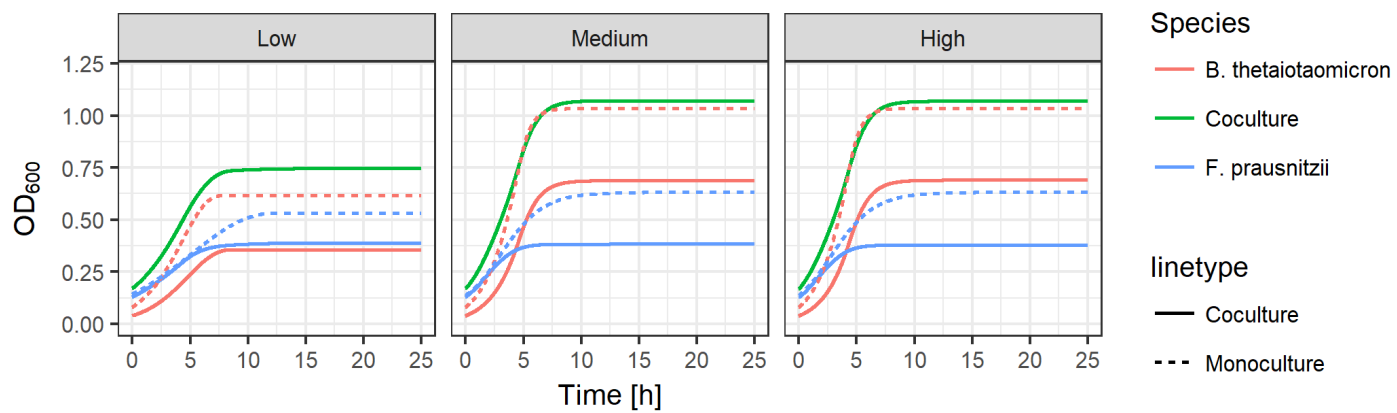

Figure 6. A) Butyrate concentration time profile, normalized by the simulated *F. prausnitzii* biomass, for coculture and monoculture. B) Simulated species composition.
